# Supplementary material for: Evaluation of an Assertive Management and Integrated Care Service for Frequent Emergency Department Attenders with Substance Use Disorders: The Impact Project: Evaluating an assertive management service for frequent ED attenders with substance use disorders
Source: PubMed Central journal article supplement (PMC7181945; doi:10.5334/ijic.5343), 2020-04-23
Supplement: ijic-20-2-5343-s1.pdf [file ijic-20-2-5343-s1.pdf]

## Appendix

**Table i:** Emergency department visit costs by triage code and admitted status, based on the Australian Public Hospitals Cost Report 2013-2014 Round 18 (16). Costs were adjusted to financial year 2015-2016 using Consumer Price Index change for health between December 2013 and December 2015 (10%), calculated using the mid-points of 2013-2014 and 2015-2016 financial years based on data released by the Australian Bureau of Statistics (17). Amounts are in Australian Dollars.

| Admitted status       | Triage code | Cost 2013-14 | Cost 2015-16 |
|-----------------------|-------------|--------------|--------------|
| Admitted              | 1           | \$1,815      | \$1,994.51   |
| Admitted              | 2           | \$1,207      | \$1,326.37   |
| Admitted              | 3           | \$942        | \$1,035.16   |
| Admitted              | 4           | \$754        | \$828.57     |
| Admitted              | 5           | \$594        | \$652.75     |
| Deceased on arrival   |             | \$168        | \$184.62     |
| Not admitted          | 1           | \$1,374      | \$1,509.89   |
| Not admitted          | 2           | \$822        | \$903.30     |
| Not admitted          | 3           | \$573        | \$629.67     |
| Not admitted          | 4           | \$371        | \$407.69     |
| Not admitted          | 5           | \$262        | \$287.91     |
| Did not wait          |             | \$159        | \$174.73     |
| Transfer presentation |             | \$1,088      | \$1,195.60   |
| Died in ED            |             | \$1,350      | \$1,483.52   |

**Table ii:** Salary rates used to calculate IMPACT staff costs, based on the NSW Health state award [22]. Amounts are in Australian Dollars.

| <b>Profession</b> | <b>Calculation method</b>                                                                                                  | <b>Hourly rate (salary only)</b> | <b>Hourly rate (with oncosts*)</b> |
|-------------------|----------------------------------------------------------------------------------------------------------------------------|----------------------------------|------------------------------------|
| Social worker     | Midpoint of level 2 year 4 and level 3 year 1 (midpoint of levels 1-6) – levels 7-8 not considered as they are managerial) | \$44.15                          | \$49.10                            |
| D&A specialist    | Midpoint of levels 3 and 4 in NSW Health staff specialist award                                                            | \$89.38                          | \$98.63                            |

\*9.5% base salary as superannuation, plus \$1,500 infrastructure support per worker per annum converted to an hourly rate based on a 38-hour week.
